# Supplementary material for: Transcriptome profiling and characterization of peritoneal metastasis ovarian cancer xenografts in humanized mice
Source: PubMed Central journal article supplement (PMC11126626; doi:10.1038/s41598-024-60501-z), 2024-05-24

**A**

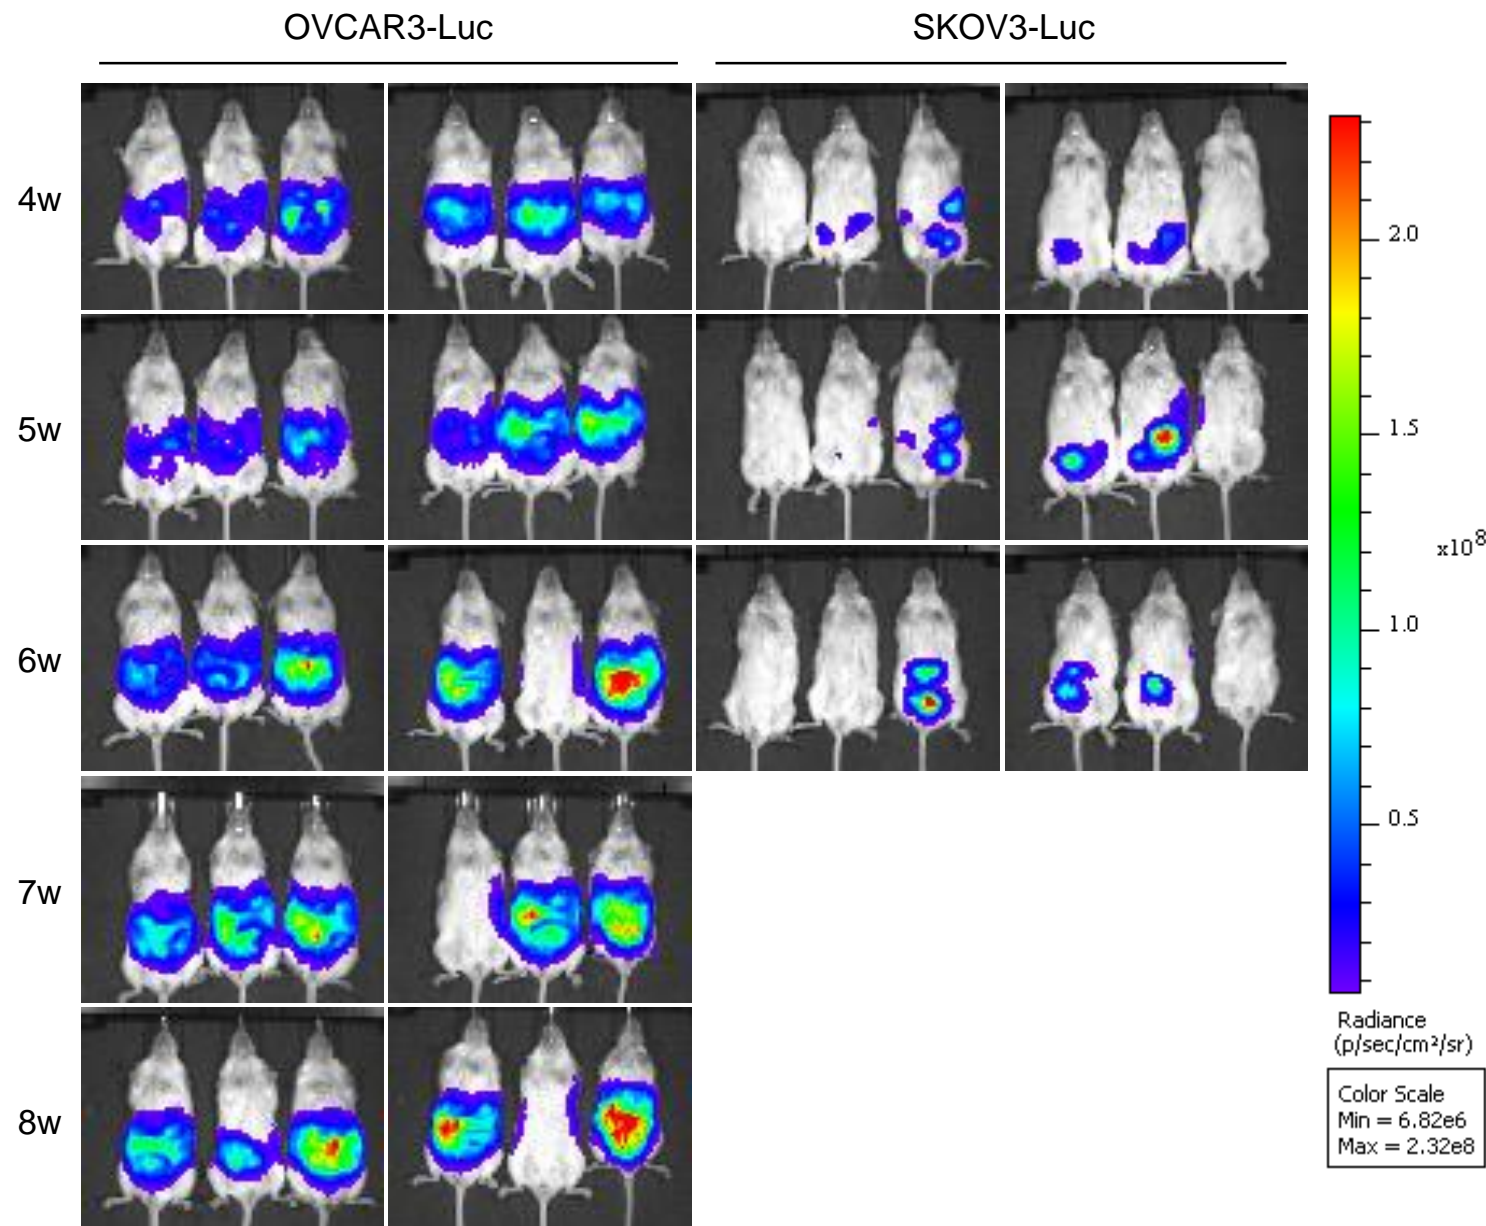

**B**

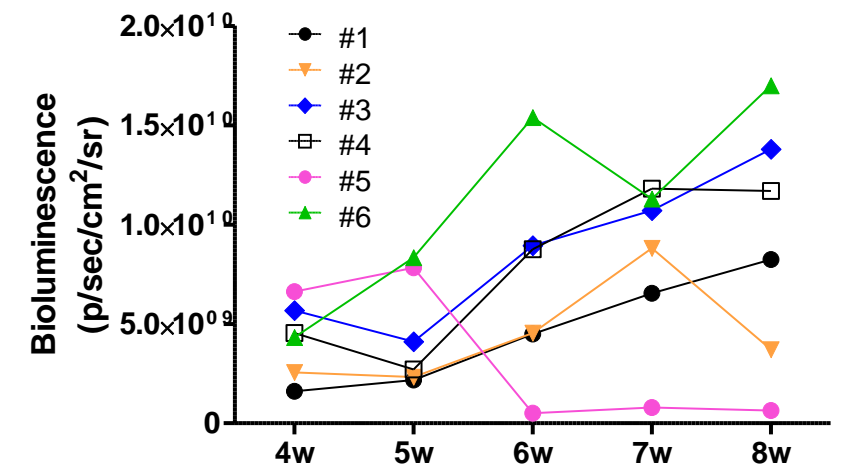

**C**

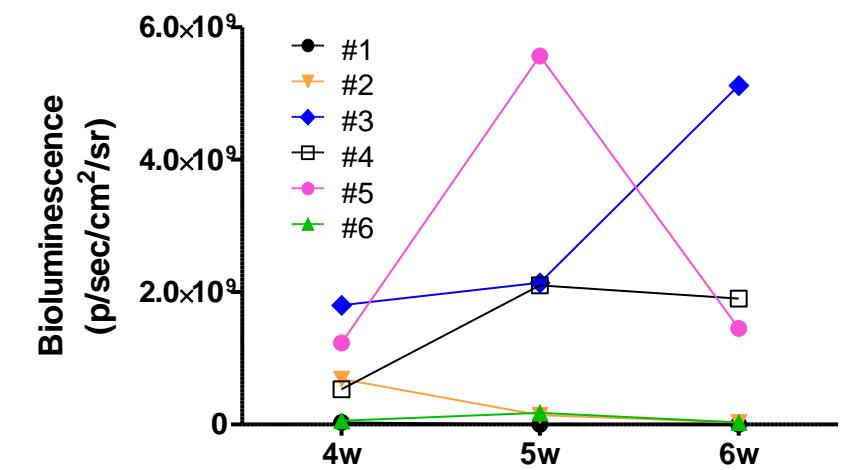

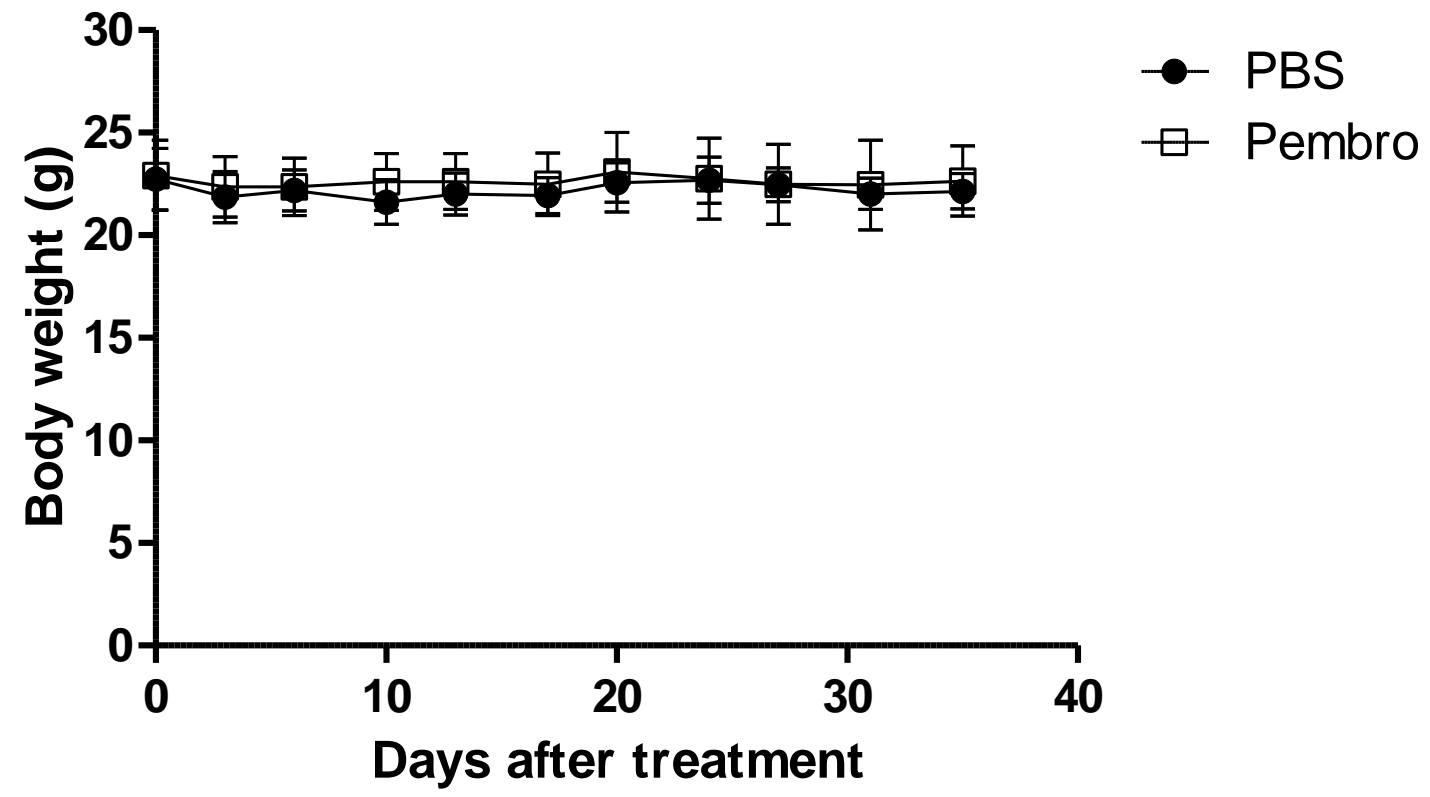

**A**

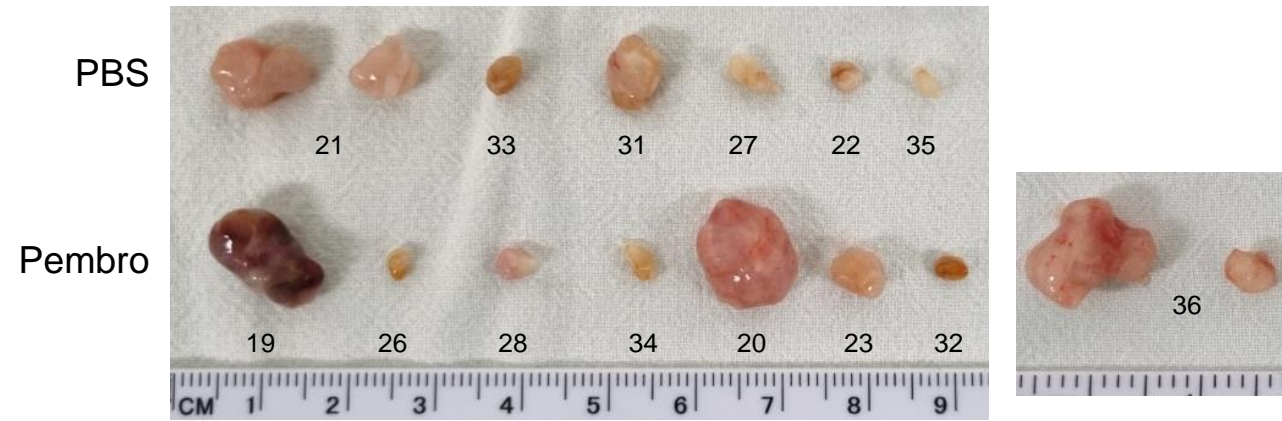

**B**

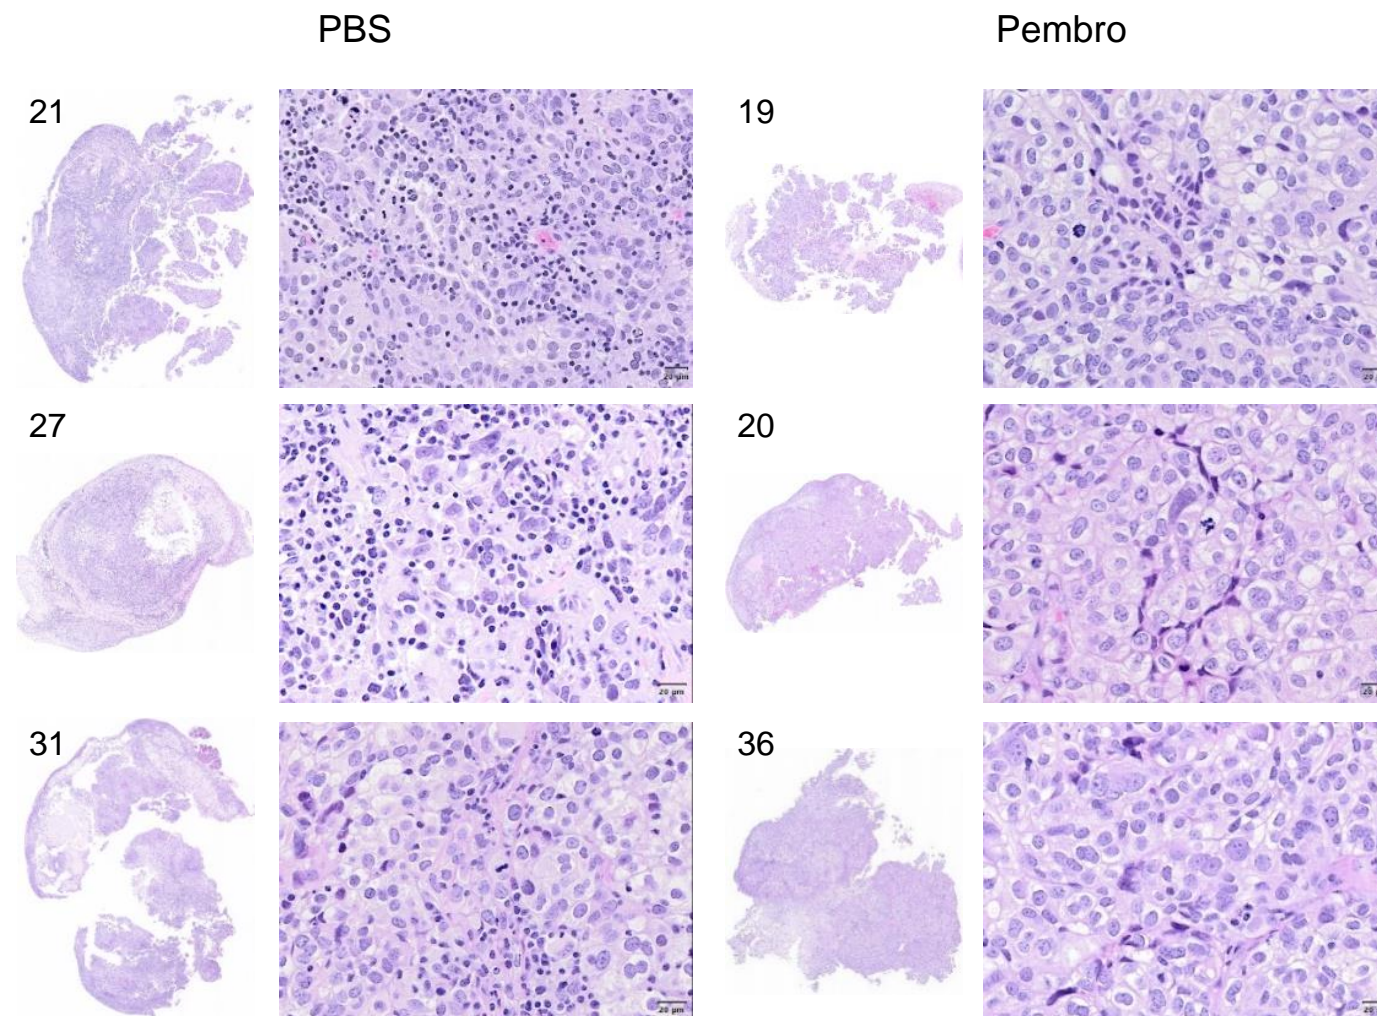

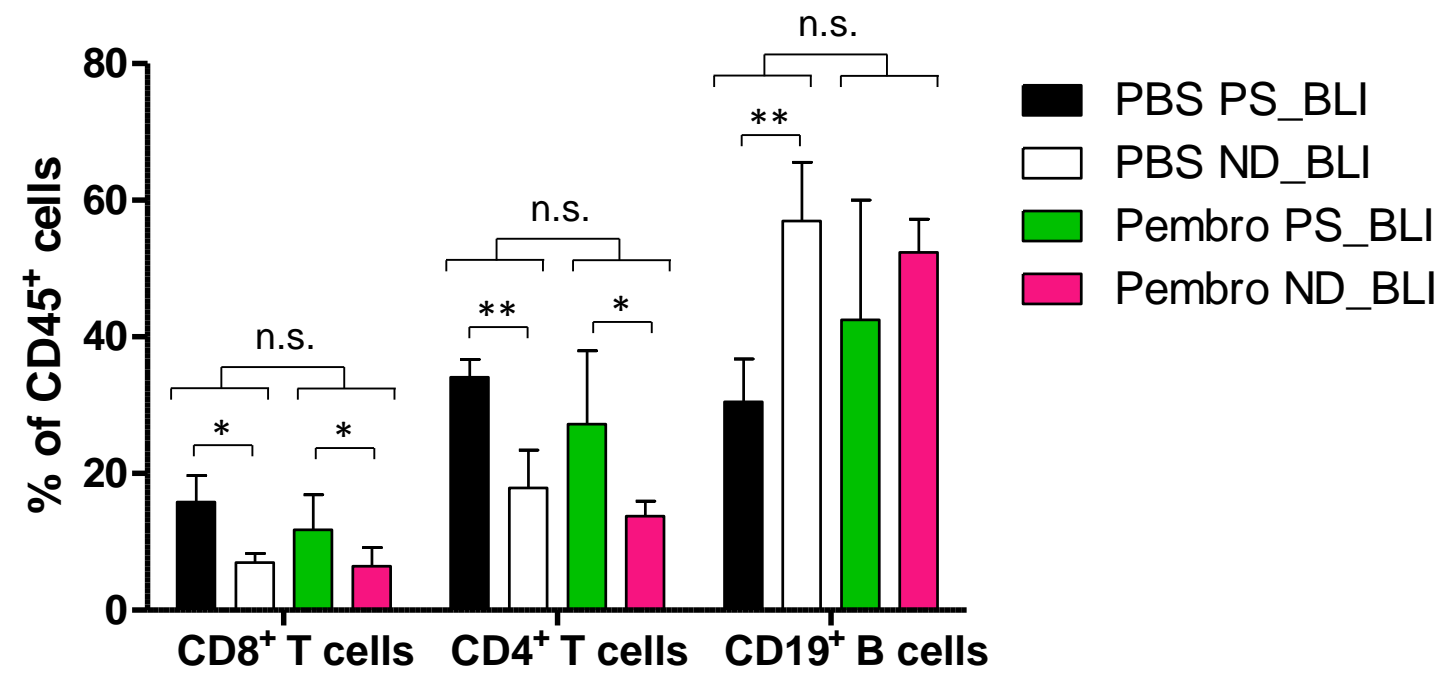





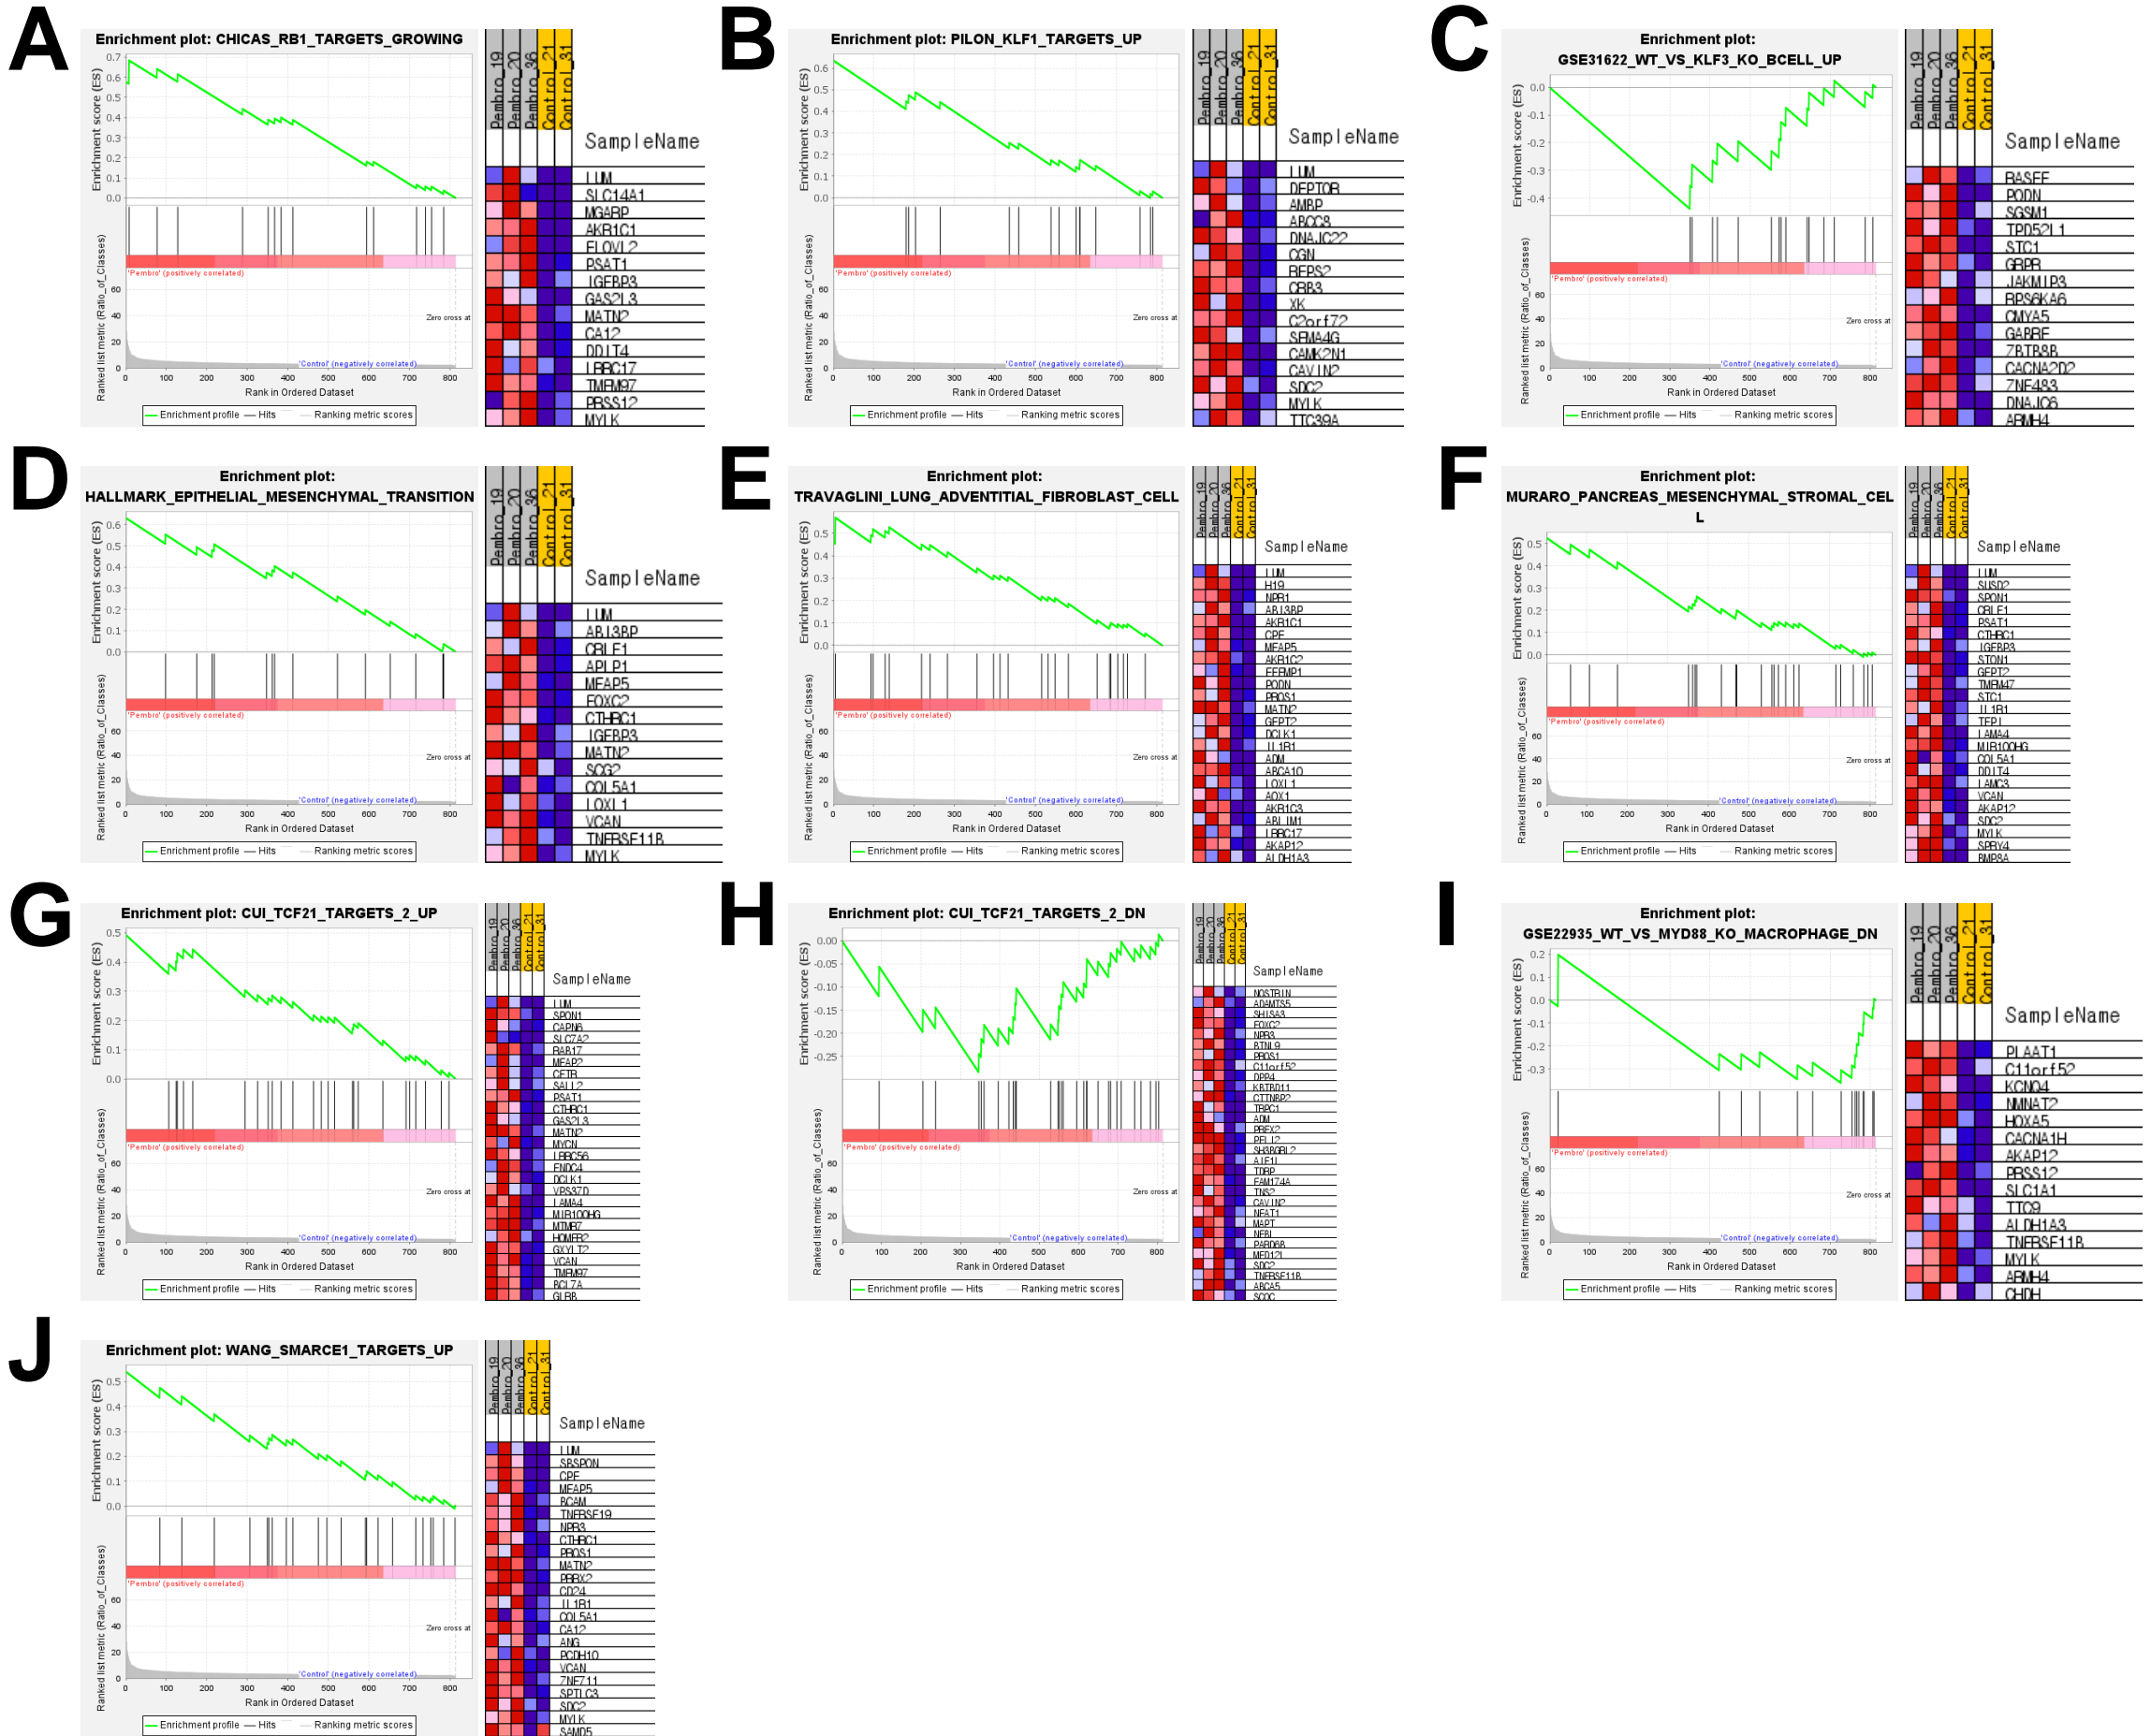

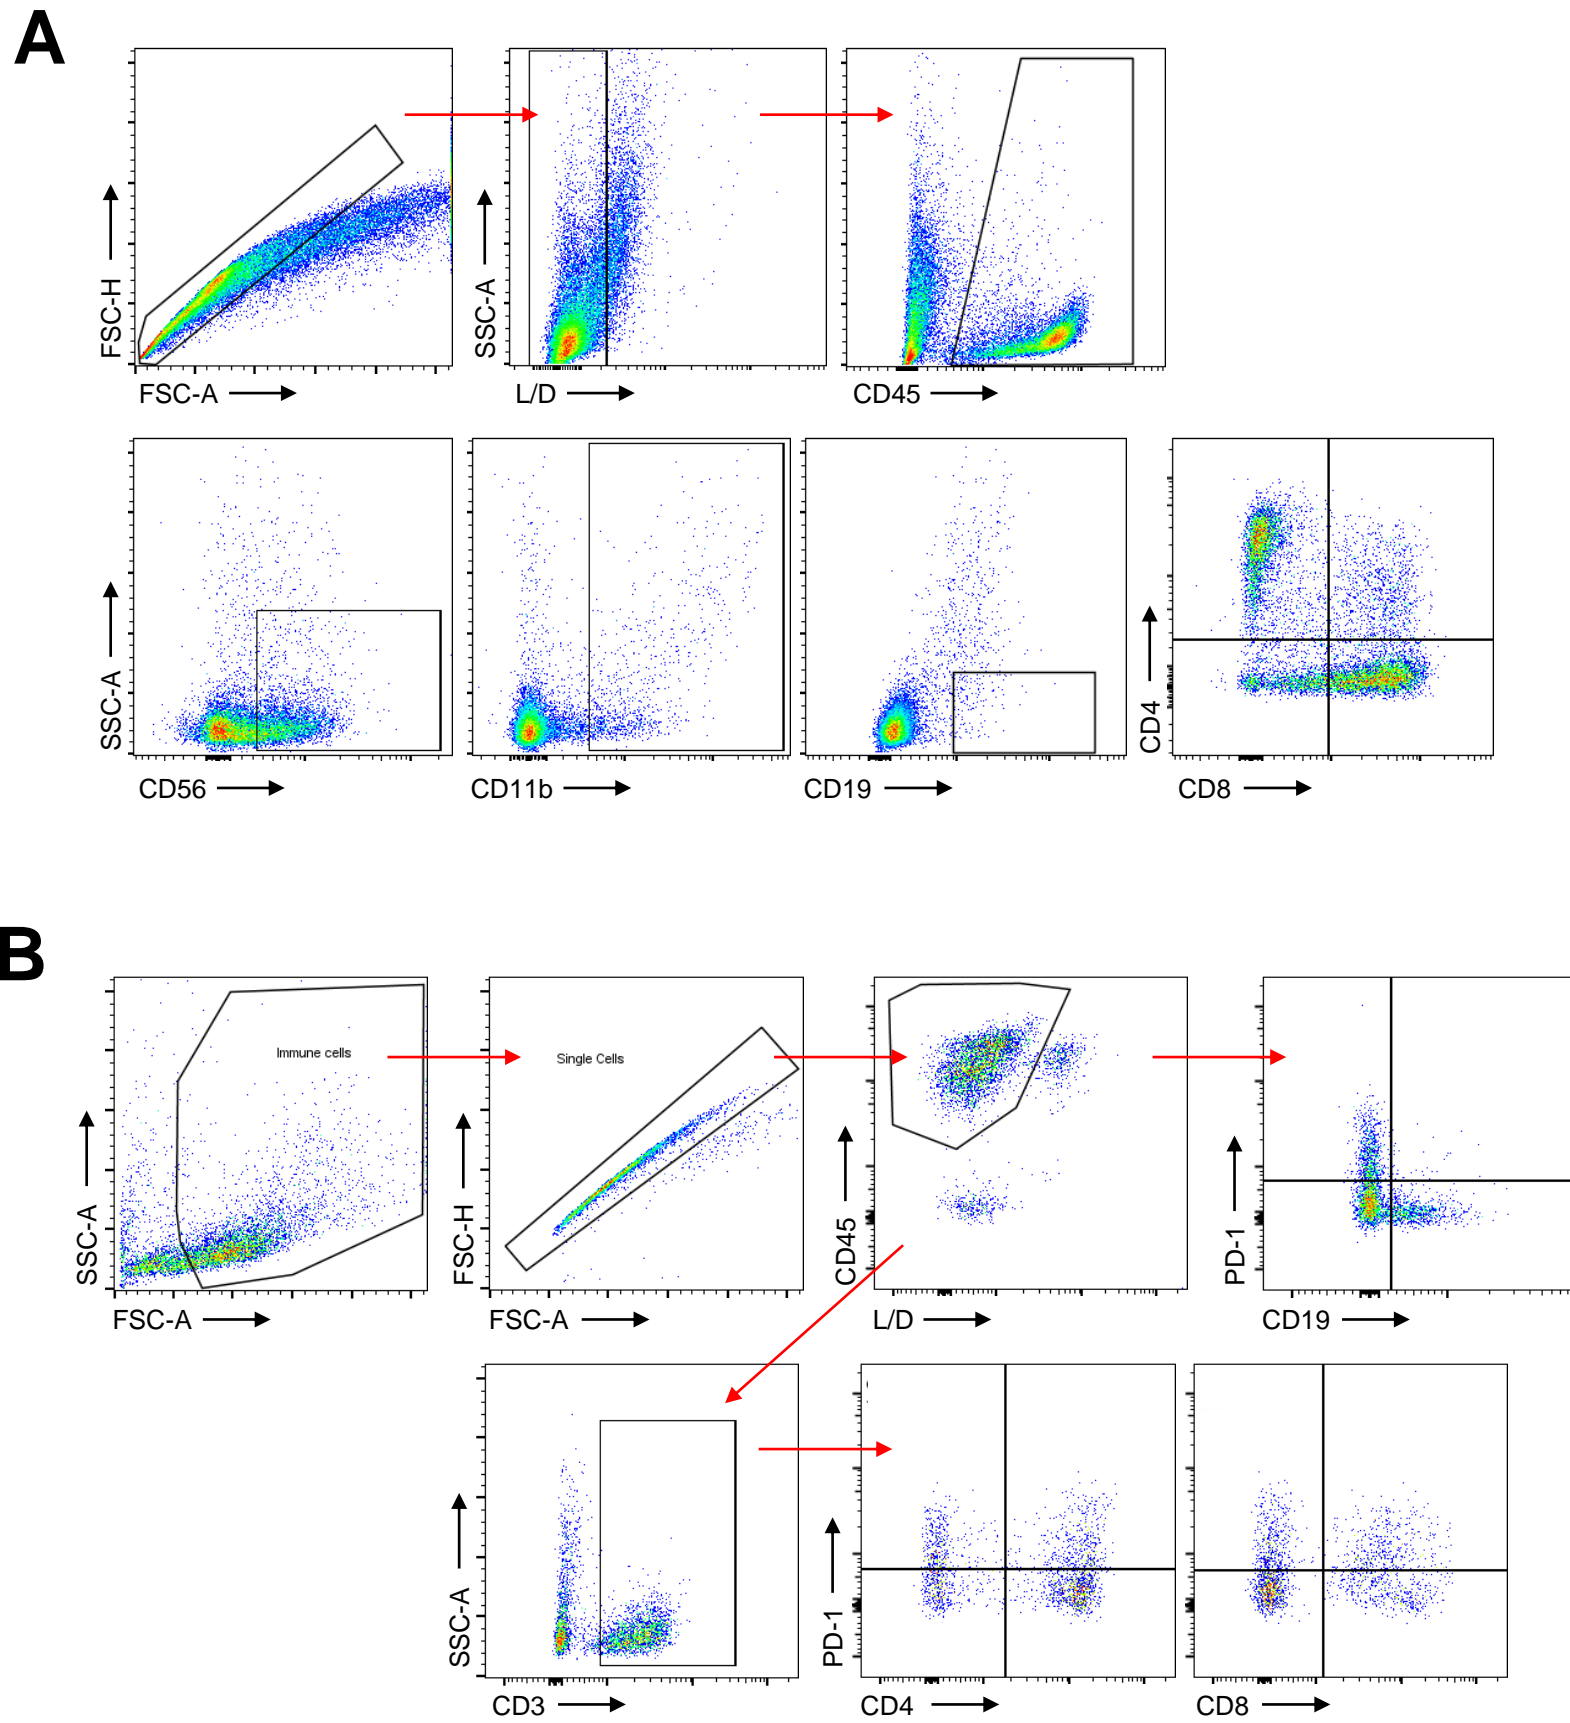

Supplement: 41598_2024_60501_MOESM2_ESM.pdf [file 41598_2024_60501_MOESM2_ESM.pdf]
